# Supplementary material for: Preoperative Fluorouracil, Doxorubicin, and Streptozocin for the Treatment of Pancreatic Neuroendocrine Liver Metastases
Source: Springer Nature journal article supplement (doi:10.1245/s10434-018-6468-8), 2018-04-06
Supplement: MOESM1 [file 15597266]

**Supplementary Table:** Clinicopathologic characteristics and outcomes of patients with synchronous pancreatic neuroendocrine liver metastases

|  |  | Preoperative FAS | |  |
| --- | --- | --- | --- | --- |
|  | All Patients  (n=46) | No  (n=20) | Yes  (n=26) | P value |
| Gender (M: F) | 25:31 | 8:12 | 17:9 | 0.085 |
| Median Age, years (range) | 51(26-74) | 49(26-71) | 51(29-74) | 0.277 |
| Median Body mass index (kg/m2) (range) | 26.5(18.7-41.3) | 25.8(20.7-35.8) | 27.5 (18.7-41.3) | 0.845 |
| Number of tumors, Solitary/Multiple/Range | 15/31/1-15 | 4/16/1-15 | 11/15/1-10 | 0.104 |
| Median Size of Largest Tumor, mm (range) | 38.5 (3-127) | 28.0 (3-121) | 39(10-127) | 0.110 |
| Bilateral tumor location | 20 (43%) | 8 (40%) | 12 (46%) | 0.676 |
| Major resection | 13 (28%) | 7 (35%) | 6 (23%) | 0.375 |
| Resection with RFA | 7 (15%) | 4 (20%) | 3 (12%) | 0.430 |
| R1 resection | 13 (28%) | 5 (26%) | 8 (31%) | 0.744 |
| Major postoperative complications | 14 (30%) | 7 (35%) | 7 (27%) | 0.556 |
| Primary T stage, T1/T2/T3/T4/unknown | 1/6/34/1/4 | 0/5/11/1/3 | 1/1/23/0/1 | *0.037* |
| Primary N stage, N0/N1/unknown | 13/30/3 | 6/12/2 | 7/18/1 | 0.708 |
| Grade G1-G2/G3/unknown | 29/1/16 | 10/1/9 | 19/0/7 | 0.158 |
| Median Ki 67 Index (range) | 5 (1-24) | 3.25 (1-24) | 5 (1.9-20) | 0.359‡ |

Results are number (%) unless otherwise mentioned
